# Supplementary material
Source: publisher figshare collection journal article supplement (https://acs.figshare.com/ndownloader/files/13778651)
Supplement: Supplementary file 1 [file 13778651]

## Sheet: Sheet 1
Table S5- 6 proteins enriched by >5.0 fold (C151A/WT HDAC1) in 4 out of 4 trials
* Data in normalized trials shown here were taken from Table S2. See Table S2 for more information on calculation of fold enrichment and filtering of false positives.
Proteins from Table S4 were filtered to only include proteins with >5.0-fold enrichment in C151A mutant (green columns) compared to wild type (WT, set to 1.0) in allf 4 trials.
Proteins are in order from highest (top) to lowest (bottom) fold change in the C151A sample (green highlight) in the four trials. When WT HDAC1 was 0 (no peptides present), the fold enrichment is indicated as a symbol of ∞ (infinity), which is the highest possible fold enrichment.
Proteins with more than one Protein ID and Gene name indicate that the identified peptide is found in more than one isoform of that protein.
					TRIAL 1 normalized*				TRIAL 2 normalized*				TRIAL 3 normalized*				TRIAL 4 normalized*
Protein IDs	Protein names	Gene names	Localization	No protein	WT HDAC1	C151A	C151A+SAHA	No protein	WT HDAC1	C151A	C151A+SAHA	No protein	WT HDAC1	C151A	C151A+SAHA	No protein	WT HDAC1	C151A	C151A+SAHA
Q8N4J0	UPF0586 protein C9orf41	C9orf41	N/C	0	0	∞	∞	0	0	∞	0	0	0	∞	∞	0	0	∞	∞
O75190	DnaJ homolog subfamily B member 6;DnaJ homolog subfamily B member 3	DNAJB6	N	0	0	∞	∞	0	0	∞	∞	0	1	16.3125	8.58866	0	0	∞	∞
Q99471	Prefoldin subunit 5	PFDN5	N/C	0	0	∞	0	0	0	∞	∞	0.565069	1	8.90853	5.77823	0	0	∞	∞
P52701	DNA mismatch repair protein Msh6	MSH6	N	0	0	∞	∞	0	0	∞	∞	0	1	5.11309	1.45811	0	1	7.28934	5.08954
P20700	Lamin-B1	LMNB1	N	0	1	5.2681	0	0	0	∞	∞	0	1	10.2096	5.62789	0	1	19.1822	17.5028
O43823	A-kinase anchor protein 8	AKAP8	N/C	0	1	5.03072	2.0189	0	0	∞	0	0.503394	1	6.46823	5.0023	0	1	7.49612	7.43123
